# Supplementary material for: Catalytic ozonation of sulfamethoxazole using low-cost natural silicate ore supported Fe2O3: influencing factors, reaction mechanisms and degradation pathways
Source: Royal Society of Chemistry journal article supplement (doi:10.1039/d2ra06714e), 2023-01-01
Supplement: d2ra06714e1.pdf [file d2ra06714e1.pdf]

**Catalytic ozonation of sulfamethoxazole using low-cost natural  
silicate ore supported Fe<sub>2</sub>O<sub>3</sub>: influencing factors, reaction  
mechanisms and degradation pathways**

Lisha Luo<sup>ab</sup>, Zhiyu Sun<sup>b</sup>, Yuxi Chen<sup>a</sup>, Hui Zhang<sup>b</sup>, Yinkun Sun<sup>b</sup>, Jun Ma<sup>b</sup> and  
Dongwei Lu<sup>b\*</sup>

- <sup>a</sup>. College of Resources and Environmental Engineering, Jilin Institute of Chemical Technology, Jilin;
- <sup>b</sup>. State Key Laboratory of Urban Water Resource and Environment, Harbin Institute of Technology, Harbin.

**Table S1 The main instruments used in the experiment**

| Instrument name                                   | Instrument model     | Manufacturer                                       |
|---------------------------------------------------|----------------------|----------------------------------------------------|
| Ozone generator                                   | DHX-I                | Harbin Jiujiu Electrochemical Engineering Co., Ltd |
| High performance liquid chromatography            | LC-1200              | Agilent, USA                                       |
| Total organic carbon                              | TOC-V <sub>CPN</sub> | Shimadzu, Japan                                    |
| Inductively-Coupled Plasma Emission Spectrometer  | OPTIMA 5300DV        | Perkin Elmer, USA                                  |
| Ion chromatograph                                 | ICS-3000             | Dionex, USA                                        |
| Specific surface area and porosity analyzer       | ASAP 2020M           | Micromeritics, USA                                 |
| X-ray powder diffractometer                       | D/max-RA             | Rigaku, Japan                                      |
| Fourier-Transform Infrared Spectrometer           | Spectrum 2000        | Perkin Elmer, USA                                  |
| X-ray photoelectron spectrometer                  | AXIS ULTRA DLD       | Kratos, UK                                         |
| Scanning Electron Microscope                      | SU8000               | Hitachi, Japan                                     |
| Fluorescence spectrophotometer                    | FP6500               | Hitachi, Japan                                     |
| Liquid tandem mass spectrometry triple quadrupole | QTRAP ® 5500         | AB SCIEX, USA                                      |

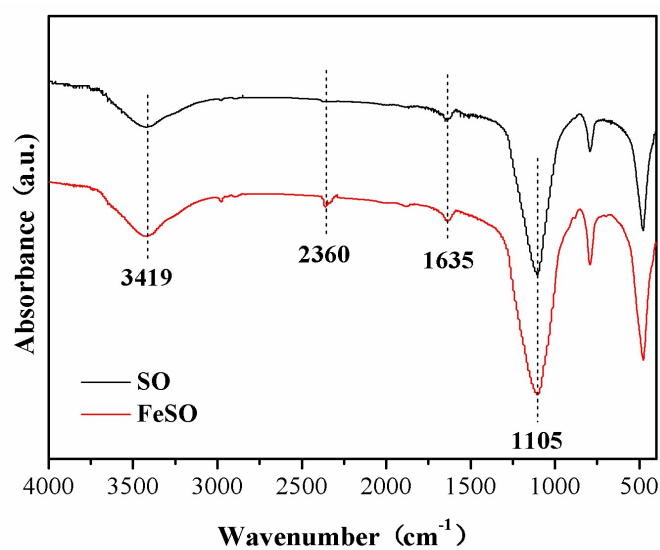

Fig. S1. FTIR spectra of SO and FeSO.

**Table S2 LC-MS Liquid elution model**

| Gradient order | Time (min ) | Flow rate ( $\mu\text{l min}^{-1}$ ) | Acetonitrile (%) | Ultrapure water (%) |
|----------------|-------------|--------------------------------------|------------------|---------------------|
| 0              | 0.00        | 200                                  | 10               | 90                  |
| 1              | 10.00       | 200                                  | 10               | 90                  |
| 2              | 40.00       | 200                                  | 90               | 10                  |
| 3              | 50.00       | 200                                  | 90               | 10                  |
| 4              | 50.10       | 200                                  | 10               | 90                  |
| 5              | 60.00       | 200                                  | 10               | 90                  |

**Table S3 Summary of N<sub>2</sub> adsorption – desorption results of catalysts.**

| Sample | BET ( $\text{m}^2 \text{g}^{-1}$ ) | Pore volume ( $\text{cm}^3 \text{g}^{-1}$ ) | Average pore size (nm) |
|--------|------------------------------------|---------------------------------------------|------------------------|
| SO     | 75.56                              | 0.24                                        | 12.95                  |
| FeSO   | 53.45                              | 0.16                                        | 11.78                  |

**Table S4 Dissolution of metal ions in FeSO catalytic ozonation of SMX**

| number of use | dissolution of metal ions ( $\text{mg L}^{-1}$ ) |
|---------------|--------------------------------------------------|
| 1             | 0.068                                            |
| 2             | 0.057                                            |
| 3             | 0.056                                            |
| 4             | 0.045                                            |
| 5             | 0.041                                            |

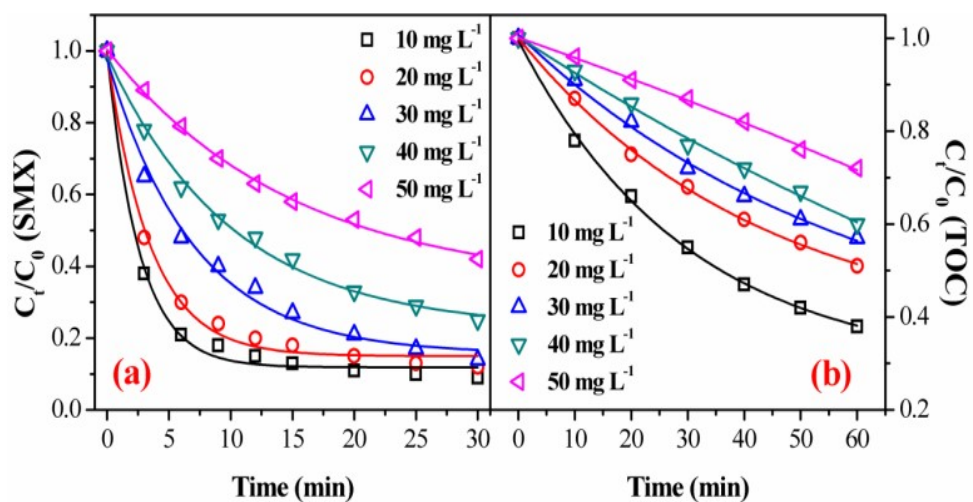

Fig. S2 Effect of initial concentration on (a) degradation and (b) mineralization of SMX in FeSO/O<sub>3</sub> (Experiment conditions: initial pH= 7.0, ozone dosage =0.4 mg min<sup>-1</sup>, FeSO =1.0 g L<sup>-1</sup> and T=20 ± 1°C).

Table S5 Decomposed products of SMX by catalytic ozonization degradation

| Item | $[M + H]^+(m/z)$ | Molecular formula     | Structural formula |
|------|------------------|-----------------------|--------------------|
| SMX  | 254              | $C_{10}H_{12}N_3O_3S$ |                    |
| DP1  | 99               | $C_4H_7N_2O$          |                    |
| DP2  | 156              | $C_6H_6NO_2S$         |                    |
| DP3  | 190              | $C_6H_8NO_4S$         |                    |
| DP4  | 246              | $C_8H_{12}N_3O_4S$    |                    |
| DP5  | 256              | $C_9H_{10}N_3O_4S$    |                    |
| DP6  | 270              | $C_{10}H_{11}O_4N_3S$ |                    |
| DP7  | 284              | $C_{10}H_{10}N_3O_5S$ |                    |
| DP8  | 108              | $C_6H_6NO$            |                    |
| DP9  | 92               | $C_6H_6N$             |                    |
| DP10 | 216              | $C_7H_{10}N_3O_3S$    |                    |

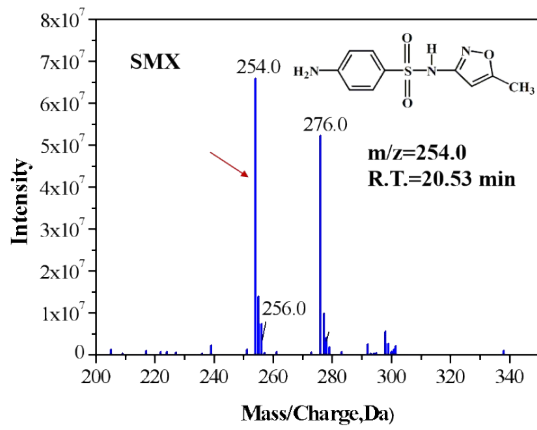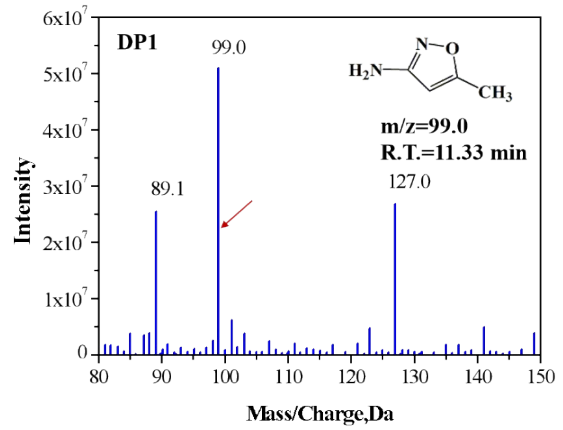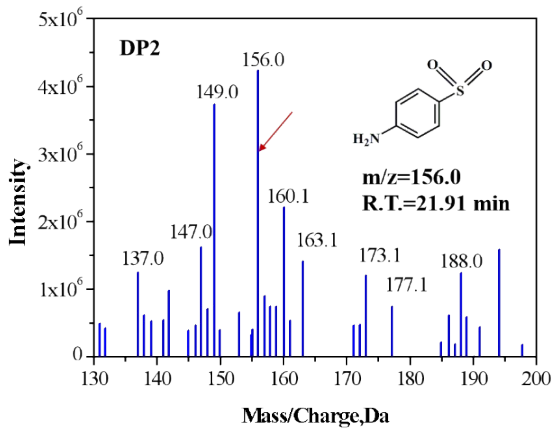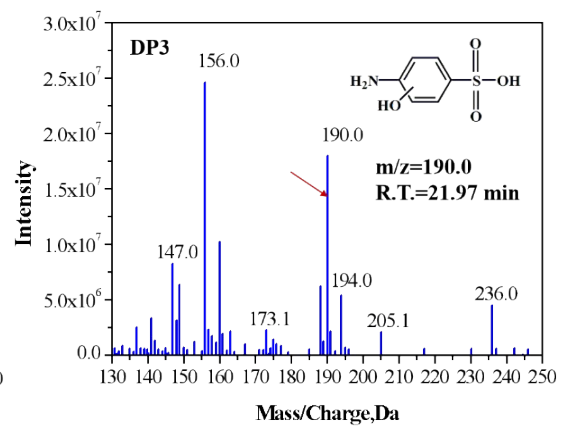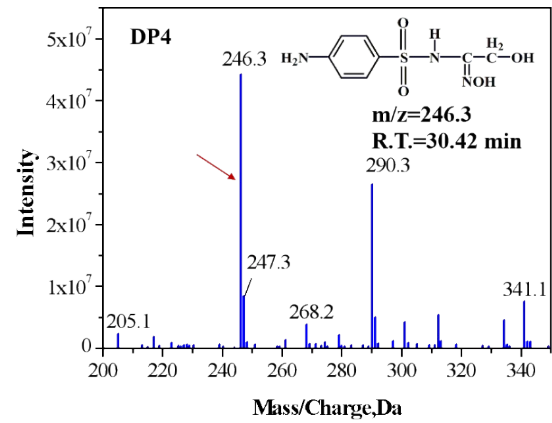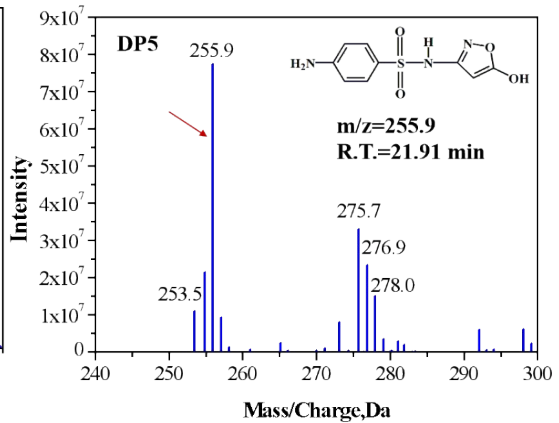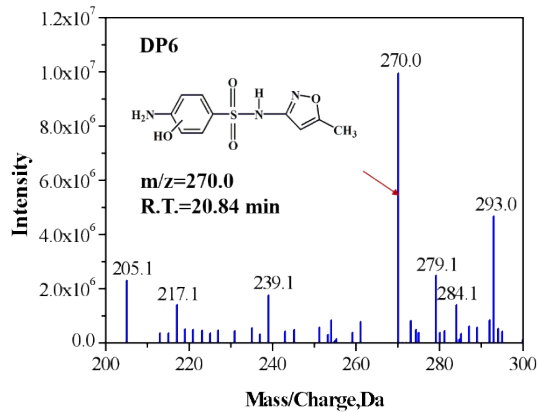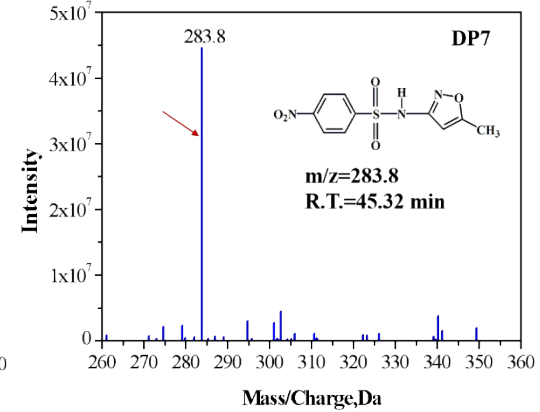

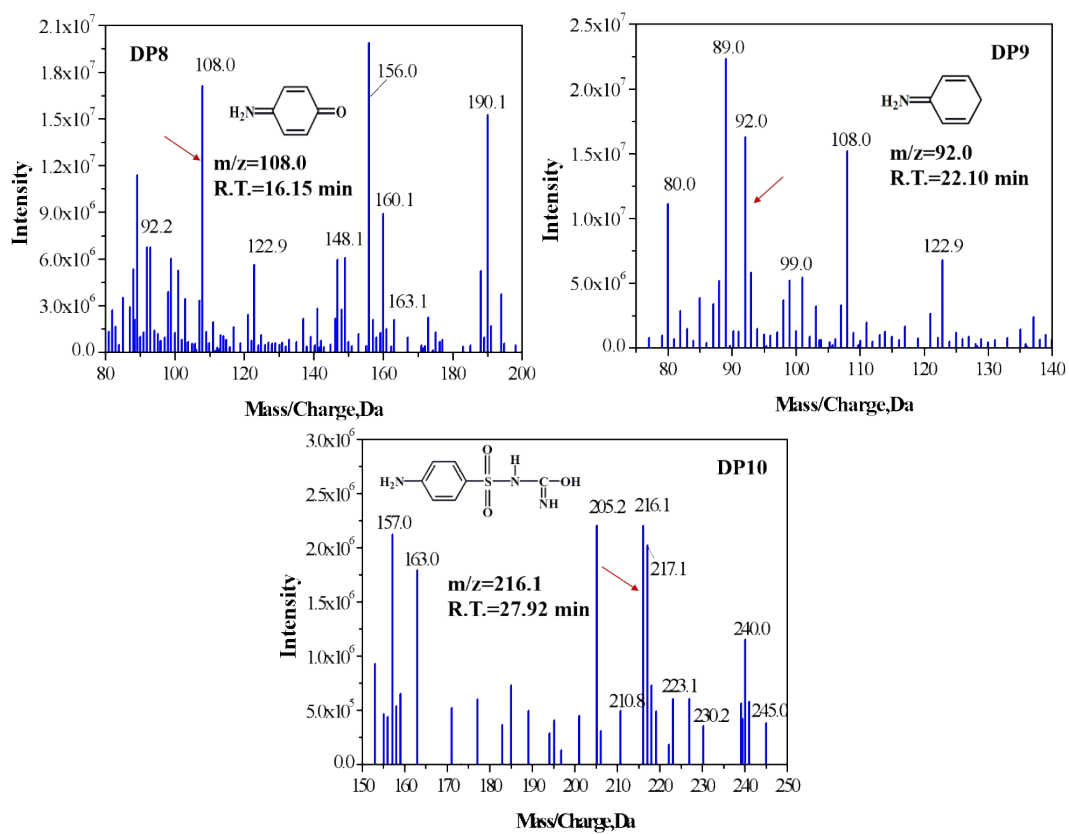

Fig. S3 LC-MS spectra of main intermediates of TCH
